# Supplementary material for: Free-standing multi-hierarchical MoC-based catalyst for pH-universal hydrogen evolution reaction at ultra-high current density
Source: Royal Society of Chemistry journal article supplement (doi:10.1039/d3ta06588j), 2023-12-19
Supplement: d3ta06588j1.pdf [file d3ta06588j1.pdf]

Supporting information

**Free-Standing Multi-Hierarchical MoC-based Catalyst for  
pH-Universal Hydrogen Evolution Reaction at Ultra-High  
Current Density**

Nan Lu<sup>a</sup>, Yue Liang<sup>a</sup>, Cai-Yun Ren<sup>b</sup>, Xue Liang<sup>a</sup>, Yong-Chao Zhang<sup>a</sup>, Xiao-Dong  
Zhu<sup>a, \*</sup>, Jian Gao<sup>a, \*</sup>

<sup>a</sup> State Key Laboratory Base for Eco-Chemical Engineering, College of Chemical  
Engineering, Qingdao University of Science and Technology, Qingdao 266042, PR  
China

<sup>b</sup> School of Materials Science and Engineering, Guangdong University of  
Petrochemical Technology, Maoming 525000, PR China

\* Corresponding author

Email: gaojian@qust.edu.cn, xiao-dong\_zhu@qust.edu.cn

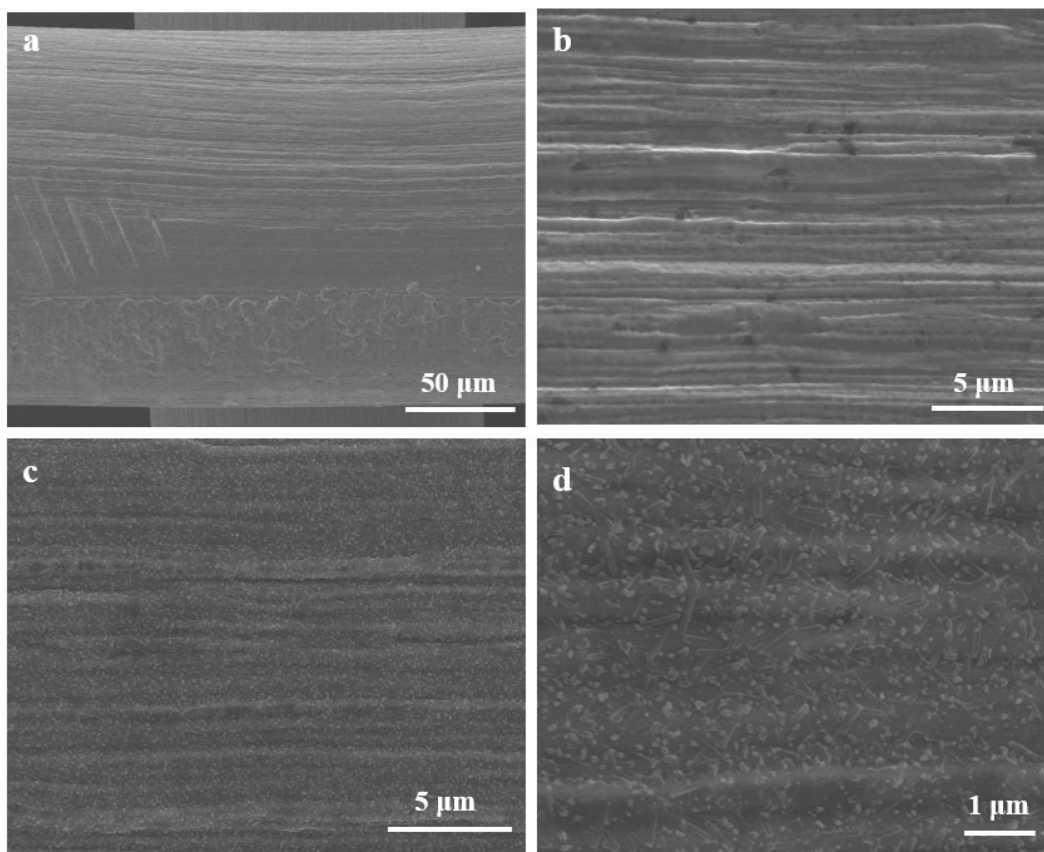

**Fig. S1.** SEM images of (a-b) Mo mesh and (c-d) MoOx-Mo mesh.

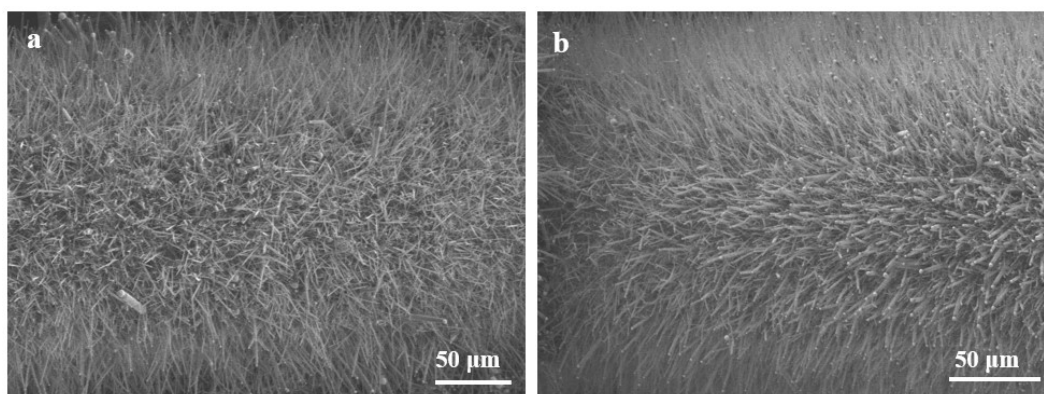

**Fig. S2.** SEM images of (a) MoC/Ni@NCNTs-MoC@C and (b) P-MoC/Ni@NCNTs-MoC@C.

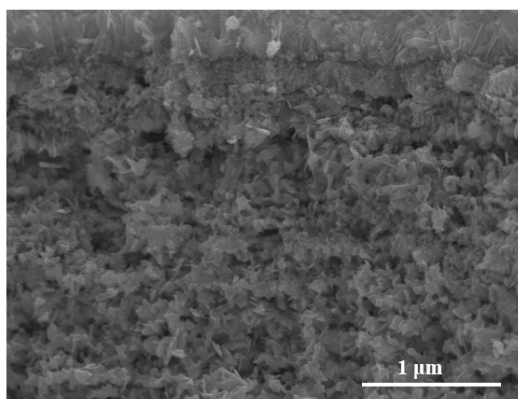

**Fig. S3.** SEM images of MoC@C shell.

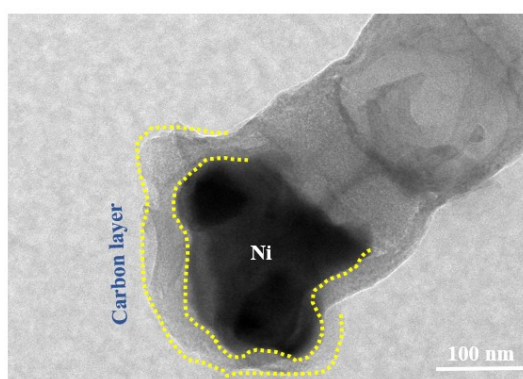

**Fig. S4.** TEM images of P-MoC/Ni@NCNTs-MoC@C.

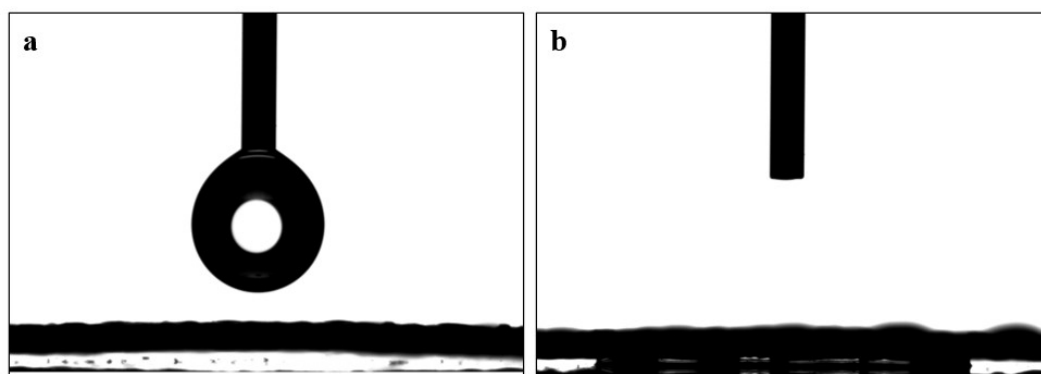

**Fig. S5.** The connect angles of P-MoC/Ni@NCNTs-MoC@C.

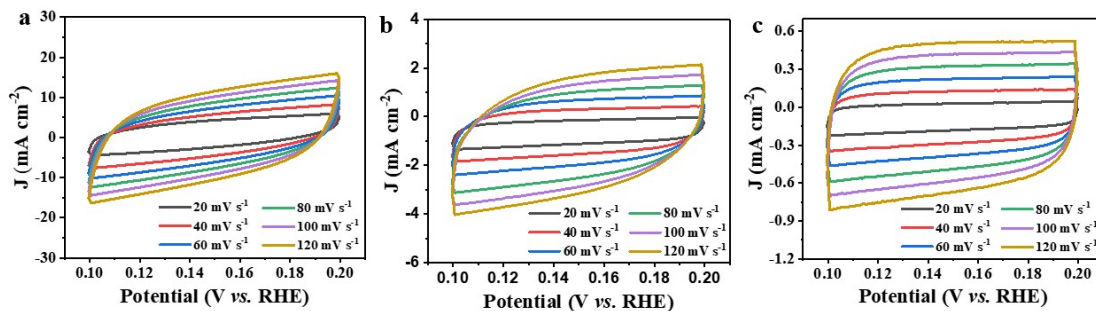

**Fig. S6.** CVs of (a) MoC/Ni@NCNTs-MoC@C, (b) MoC-Mo mesh, and (c) Mo mesh in 0.5 M  $H_2SO_4$ .

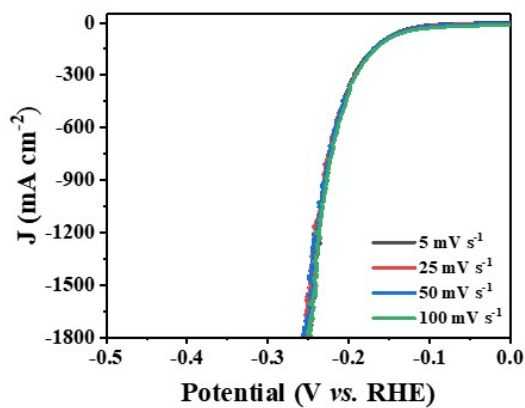

**Fig. S7.** LSV curves of P-MoC/Ni@NCNTs-MoC@C at different scan Rates in 0.5 M  $H_2SO_4$ .

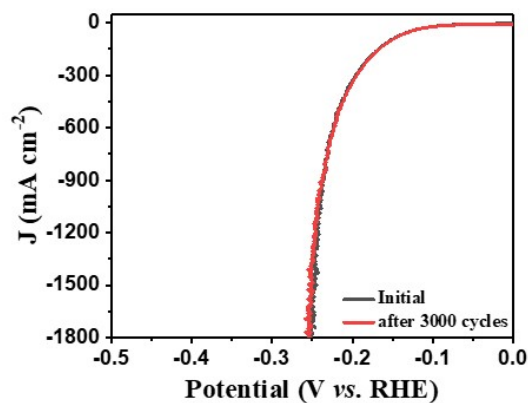

**Fig. S8.** LSV curves of P-MoC/Ni@NCNTs-MoC@C initial and after 3000 cycles test in 0.5 M  $H_2SO_4$ .

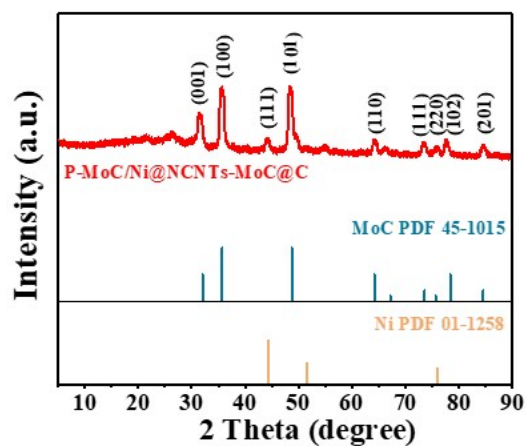

Fig. S9. XRD pattern of P-MoC/Ni@NCNTs-MoC@C after i-t test in 0.5 M H<sub>2</sub>SO<sub>4</sub>.

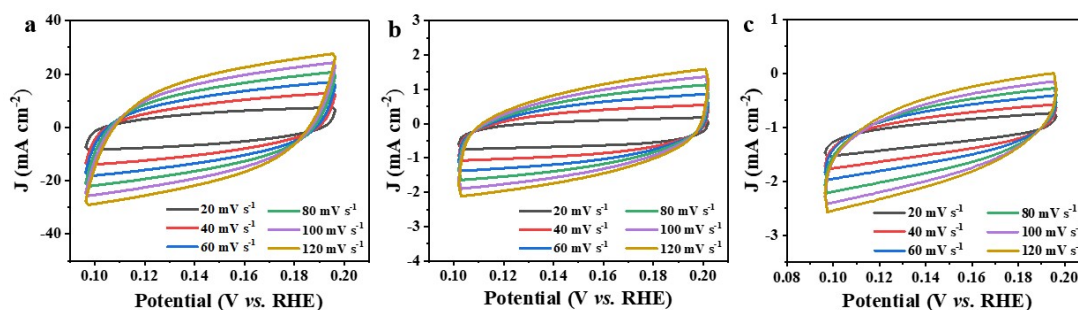

Fig. S10. CVs of (a) MoC/Ni@NCNTs-MoC@C, (b) MoC-Mo mesh, and (c) Mo mesh in 1.0 M KOH.

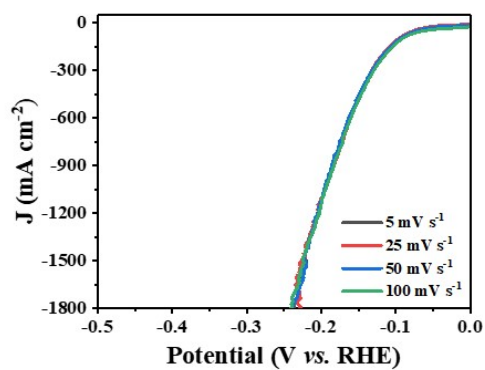

Fig. S11. LSV curves of P-MoC/Ni@NCNTs-MoC@C at different scan rates in 1.0 M KOH.

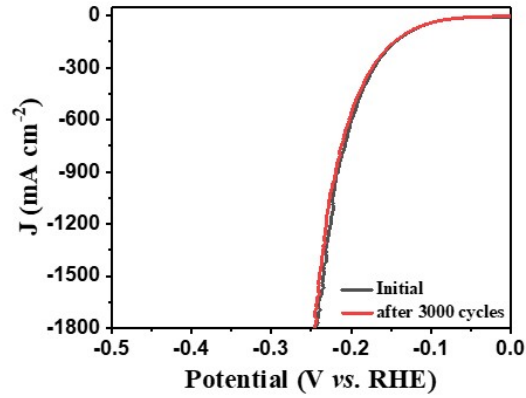

Fig. S12. LSV curves of P-MoC/Ni@NCNTs-MoC@C initial and after 3000 cycles test in 1.0 M KOH.

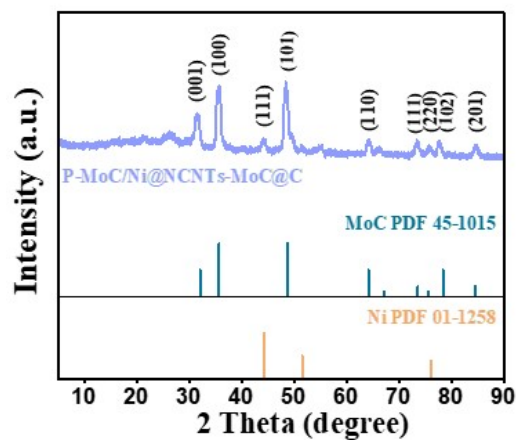

Fig. S13. XRD pattern of P-MoC/Ni@NCNTs-MoC@C after i-t test in 1.0 M KOH.

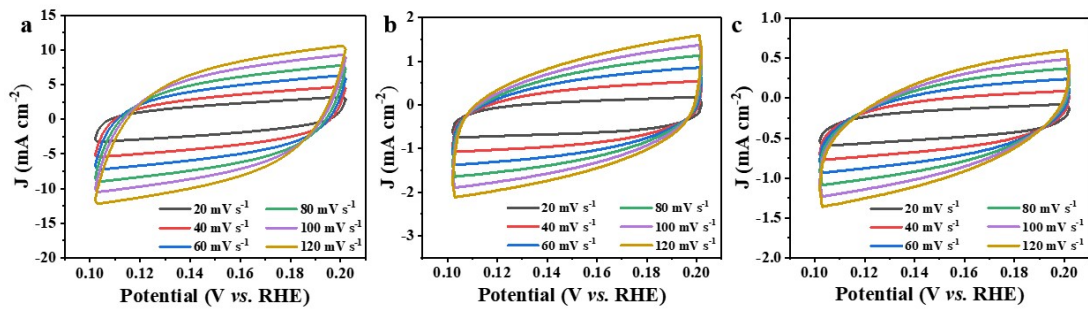

Fig. S14. CVs of (a) MoC/Ni@NCNTs-MoC@C, (b) MoC-Mo mesh, and (c) Mo mesh in 1.0 M PBS.

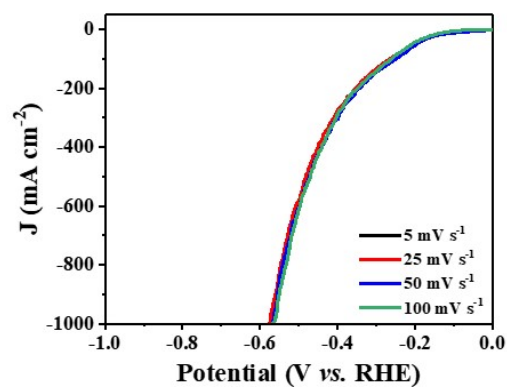

**Fig. S15.** LSV curves of P-MoC/Ni@NCNTs-MoC@C at different scan Rates in 1.0 M PBS.

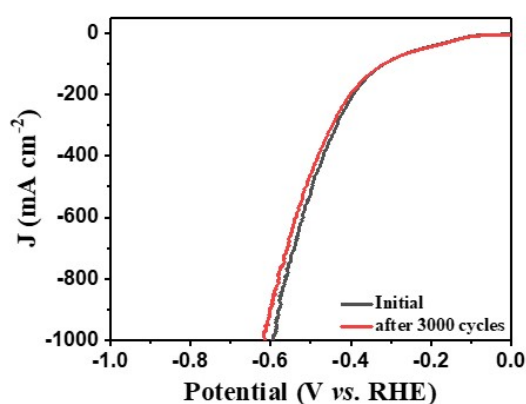

**Fig. S16.** LSV curves of P-MoC/Ni@NCNTs-MoC@C initial and after 3000 cycles test in 1.0 M PBS.

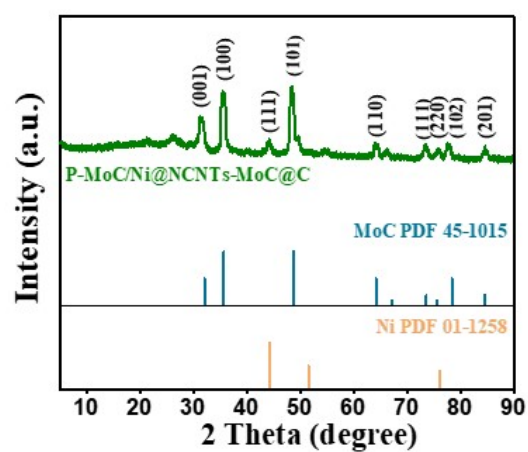

**Fig. S17.** XRD pattern of P-MoC/Ni@NCNTs-MoC@C after i-t test in 1.0 M PBS.

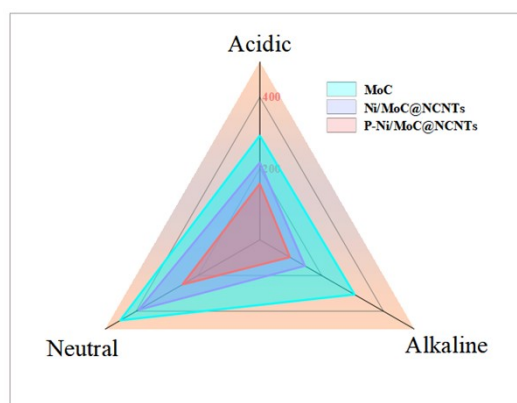

**Fig. S18.** Comparison of as-prepared samples HER performance in the full pH range.

**Table S1.** Summary of representative non-noble metal-based composite catalysts in 0.5 M H<sub>2</sub>SO<sub>4</sub>.

| Type of molybdenum carbide electrocatalyst                                                            | $\eta_{10}$ (mV) | $\eta_{100}$ (mV) | Tafel slope (mV dec <sup>-1</sup> ) |
|-------------------------------------------------------------------------------------------------------|------------------|-------------------|-------------------------------------|
| This work                                                                                             | 91.2             | 157.3             | 67.4                                |
| CM/Mo <sub>x</sub> C@NC                                                                               | 149              | 248.5             | 86                                  |
| Ni-Mo <sub>2</sub> C-0.67                                                                             | 165              | 214               | 54.1                                |
| Ni <sub>3</sub> Mo <sub>3</sub> C/Mo <sub>2</sub> C/Ti <sub>3</sub> C <sub>2</sub> T <sub>x</sub> /NC | 99               | 253               | 58                                  |
| MoS <sub>2</sub> /Mo <sub>2</sub> C                                                                   | 207              | 308.9             | 60                                  |
| Ni-MoS <sub>2</sub> /NCNTs-3                                                                          | 158              | 225.7             | 69.3                                |
| WS <sub>2</sub> /Ni <sub>5</sub> P <sub>4</sub> -Ni <sub>2</sub> P                                    | 94               | 211               | 74                                  |
| Ni <sub>2</sub> P-Co <sub>2</sub> P                                                                   | 172              | 296               | 67                                  |
| Co-NCNT/CC                                                                                            | 78               | 155               | 74                                  |
| Mo <sub>2</sub> C@SNC                                                                                 | 146              | 237               | 83                                  |
| PS/MoS <sub>2</sub> 1:2                                                                               | 154              | 250               | 71                                  |
| Ni <sub>2</sub> P/NPPC                                                                                | 159              | 261               | 74                                  |
| WC/WO <sub>3-x</sub> -900                                                                             | 34.8             | 212.6             | 59.3                                |

**Table S2.** Summary of representative non-noble metal-based composite catalysts in 1.0 M KOH.

| Type of molybdenum carbide electrocatalyst                                                            | $\eta_{10}$ (mV) | $\eta_{100}$ (mV) | Tafel slope (mV dec <sup>-1</sup> ) |
|-------------------------------------------------------------------------------------------------------|------------------|-------------------|-------------------------------------|
| This work                                                                                             | 12.1             | 97.2              | 71.1                                |
| MoC@NC                                                                                                | 98               | 465.2             | 55                                  |
| Ni-Mo <sub>2</sub> C-0.67                                                                             | 151              | 194               | 50.9                                |
| H-Mo <sub>2</sub> C/NG                                                                                | 63               | 163               | 48                                  |
| MS-Mo <sub>2</sub> C@NCNS                                                                             | 98               | 199.1             | 99                                  |
| MoOPC@NC-200                                                                                          | 69               | 154               | 60.4                                |
| CoO/Mo <sub>2</sub> C                                                                                 | 107              | 285               | 80                                  |
| Ni-MoC@NCNT/CC                                                                                        | 70               | 197.6             | 68.9                                |
| Ni <sub>3</sub> Mo <sub>3</sub> C/Mo <sub>2</sub> C/Ti <sub>3</sub> C <sub>2</sub> T <sub>x</sub> /NC | 98               | 242.8             | 69                                  |



|                                                       |      |       |       |
|-------------------------------------------------------|------|-------|-------|
| CoN/MoC/NMCNFs/CC                                     | 92.5 | 266.2 | 107.9 |
| Ni <sub>3</sub> Mo <sub>3</sub> N/Mo <sub>2</sub> C@C | 43   | 273.2 | 110   |
| N:Mo <sub>2</sub> C@NC                                | 150  | 294   | 97    |
| MoS <sub>2</sub> /Ni <sub>3</sub> S <sub>2</sub> -NF  | 187  | 274   | 90    |
| NF-Ni <sub>3</sub> S <sub>2</sub> -NF                 | 135  | 225   | 75    |

**Table S3.** Summary of representative non-noble metal-based composite catalysts in 1.0 M PBS.

| Type of molybdenum carbide electrocatalyst           | $\eta_{10}$ (mV) | $\eta$ (mV) | Tafel slope (mv dec <sup>-1</sup> ) |
|------------------------------------------------------|------------------|-------------|-------------------------------------|
| This work                                            | 85.4             | 250.5(100)  | 130.3                               |
| SiO <sub>2</sub> /PPy NTs-CFs                        | 183              | 274(40)     | 100.2                               |
| Co-Mo <sub>0.4</sub> -S                              | 213              | 379(40)     | 94                                  |
| WP NAs/CC                                            | 200              | 402(80)     | 125                                 |
| Mo <sub>5</sub> N <sub>6</sub>                       | 249              |             | 330                                 |
| Ni <sub>2</sub> P@NPCNFs                             | 185.3            | 377.2(100)  | 230.3                               |
| 3D MoS <sub>2</sub> /N-GAs                           | 261              | 402.4(40)   | 230                                 |
| Co <sub>9</sub> S <sub>8</sub> @C                    | 290              |             | 280                                 |
| FePSe <sub>3</sub> /NC                               | 140.1            | 457(100)    | 167                                 |
| Co-Fe-P                                              | 138              | 329(100)    | 138                                 |
| Mo <sub>2</sub> N <sub>x</sub> C <sub>1-x</sub> /rGO | 332              |             | 137                                 |
